# Supplementary material
Source: PubMed Central journal article supplement (PMC3668767)
Supplement: supp_M112.442442_jbc.M112.442442-1.pdf [file supp_M112.442442_jbc.M112.442442-1.pdf]

# Supplemental Figure S1

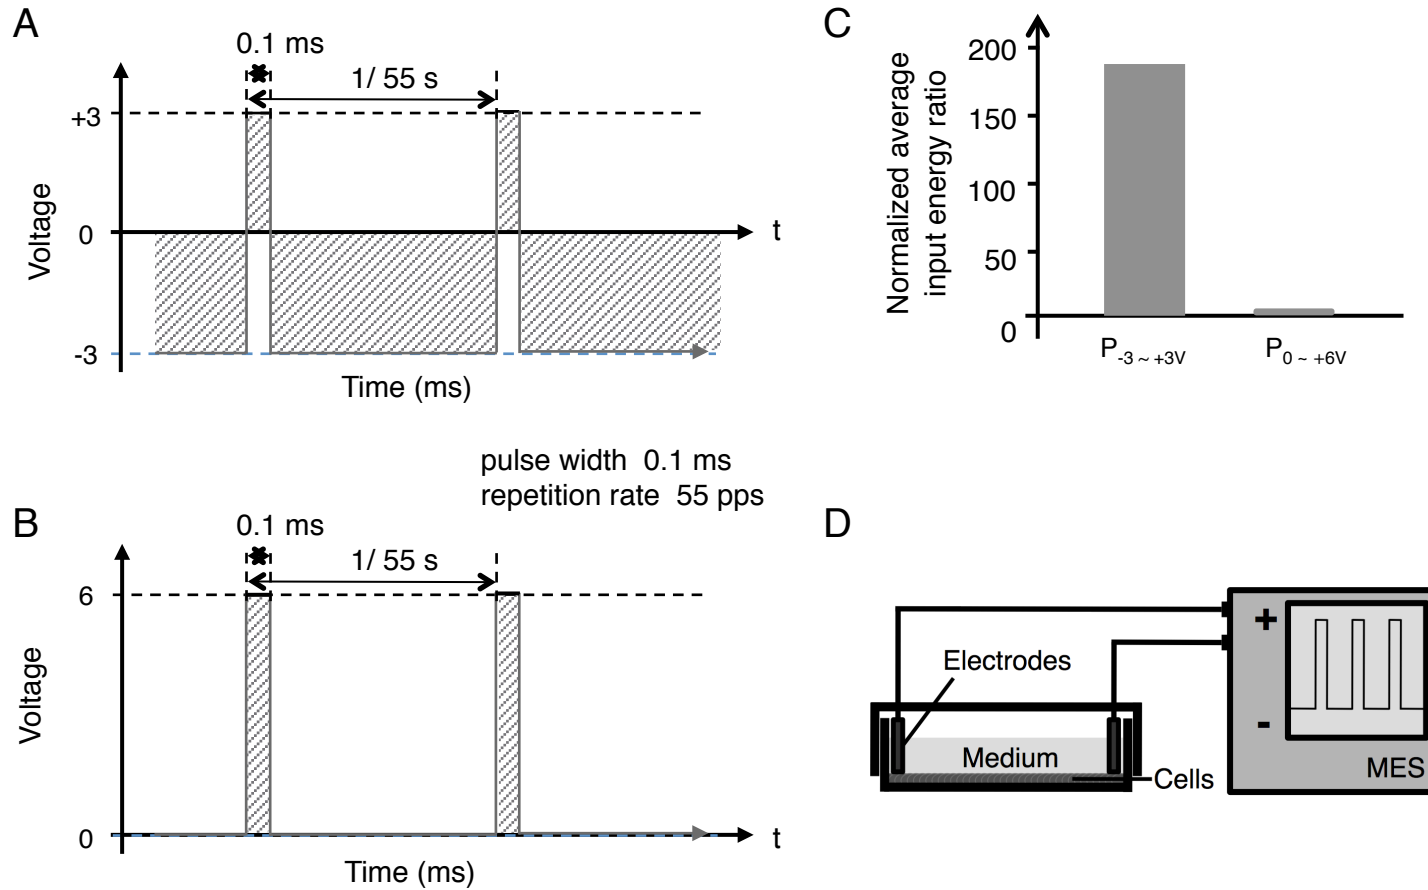

**The average input energy varies with the reference voltage.**

(A, B) The schematic of voltage waveform of 6 V amplitude with the reference voltage. (A)  $V_0 = -3$  V; (B)  $V_0 = 0$  V  
 (C) The normalized average input energy of reference voltage (-3 or 0). Pulse width 0.1 ms; Repetition rate 55 pps. Average input energy,  $P$ , is  $P = W/t = VI$  where  $W$  is Total input energy,  $t$  is time,  $V$  is voltage,  $I$  is ampere. Because the average input energy,  $P$ , depends on the voltage,  $P$  depends on the hatched area (A, B). (D) Diagram of apparatus for MES treatment.

## Supplemental Figure S2

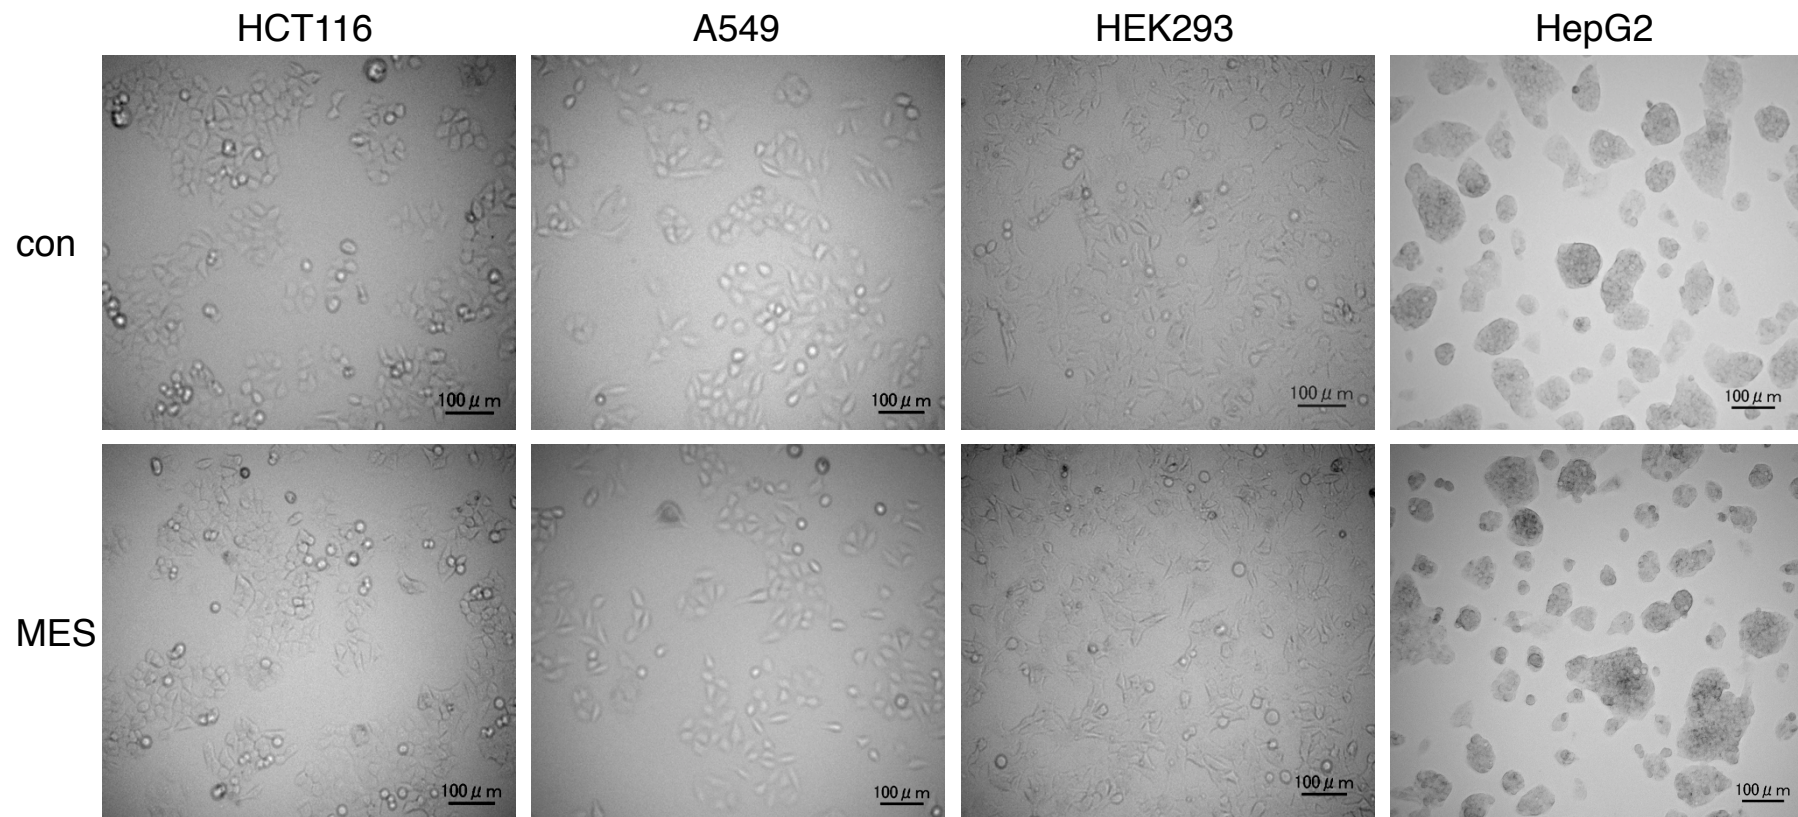

**MES treatment does not affect cellular morphology.**

HCT116, A549, HepG2 and HEK293 cells were treated with MES (1 V/cm, 0.1 ms, 55 pps) for 10 min. One hour after MES treatment, cell morphology was visually assessed using confocal microscope.

## Supplemental Figure S3

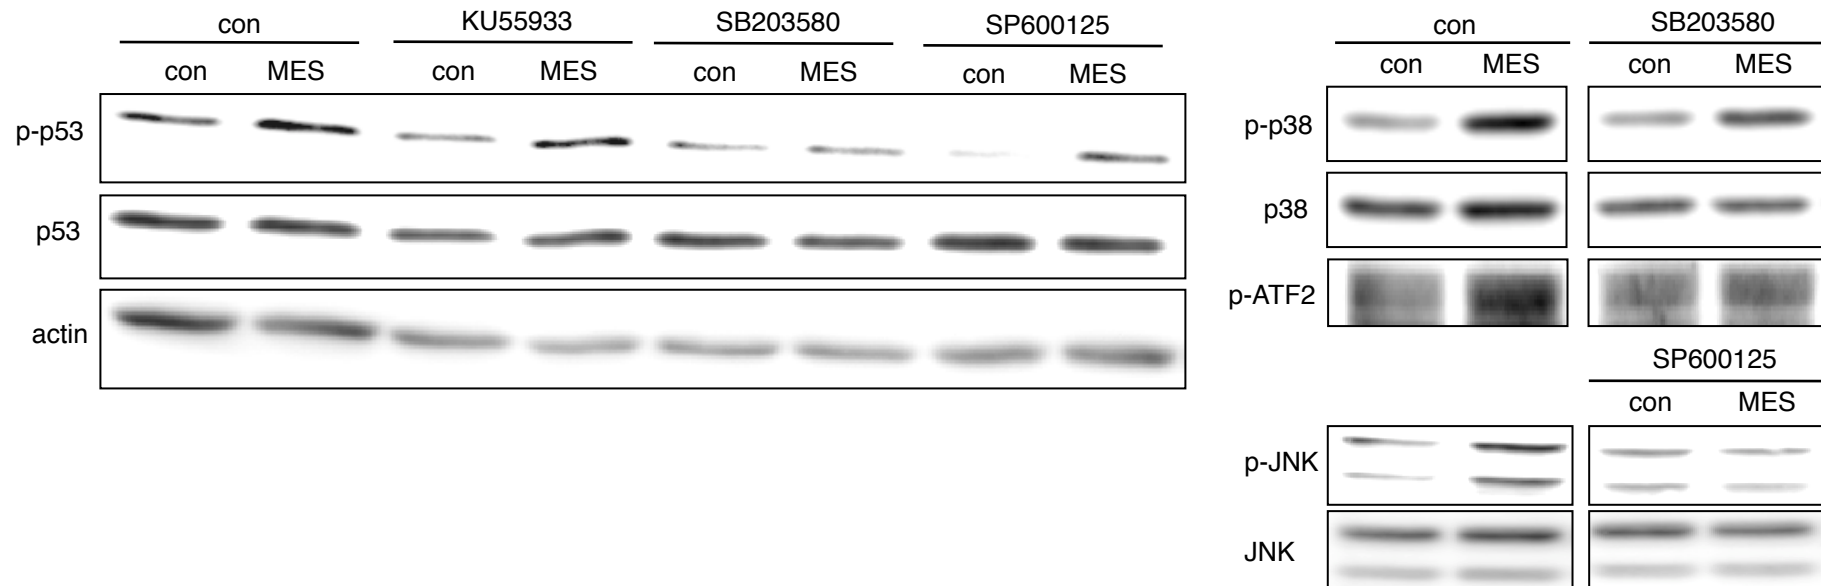

### **MES-induced p53 phosphorylation is not mediated by JNK or ATM pathways.**

HCT116 cells were treated with ATM pathway inhibitor, KU55933 (10  $\mu$ M; #118500; Calbiochem), p38 pathway inhibitor, SB203580 (10  $\mu$ M; Calbiochem) or JNK pathway inhibitor, SP600125 (20  $\mu$ M; #BML-EI305; Enzo Life Science) for 1 hr before treatment with MES (1 V/cm, 0.1 ms, 55 pps) for 30 min. Cell lysates were extracted 1 hr after MES treatment, and analyzed by Western blotting using the indicated antibodies. Phospho-JNK (Thr-183 and Tyr-185) and JNK were from Cell Signaling Technology. Actin served as loading control.

## Supplemental Figure S4

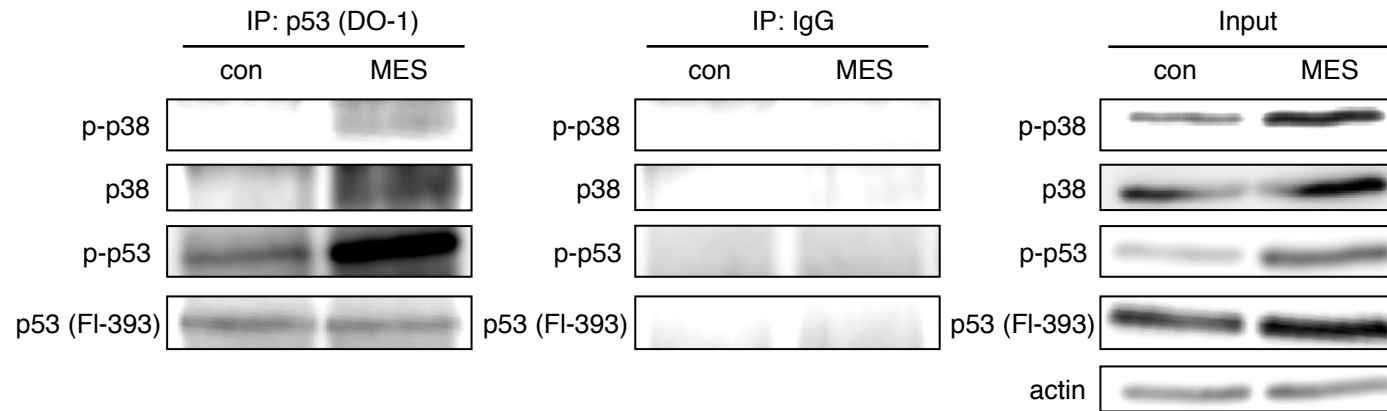

### **MES increases p-p38-p53 interaction.**

HCT116 cells were cross-linked 1 hr after MES treatment. Protein lysates were immunoprecipitated with p53 (DO-1) antibody or mouse IgG-conjugated magnetic beads (#DB10003, VERITAS). Immunoprecipitated lysates and input samples were immunoblotted and analyzed using the indicated antibodies.

## Supplemental Figure S5

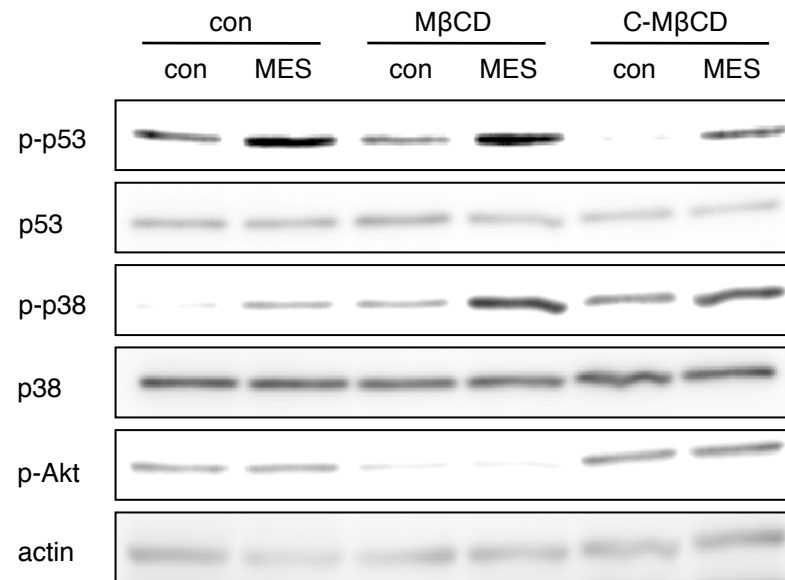

### **Cholesterol ablation has no effect on activation of p38-p53 signaling by MES in HCT116 cells.**

HCT116 cells were depleted of lipid raft by incubation with 10 mM methyl-β-cyclodextrin (MβCD) or cholesterol-saturated MβCD (C-MβCD) for 30 min, and were treated with MES (0.1 ms, 1 V/cm, 55 pps) for 30 min in the presence of 10 mM MβCD or C-MβCD. One hour after MES treatment, cell lysates were extracted. p-Akt was used as control of cholesterol depletion. Actin served as internal control.

## Supplemental Figure S6

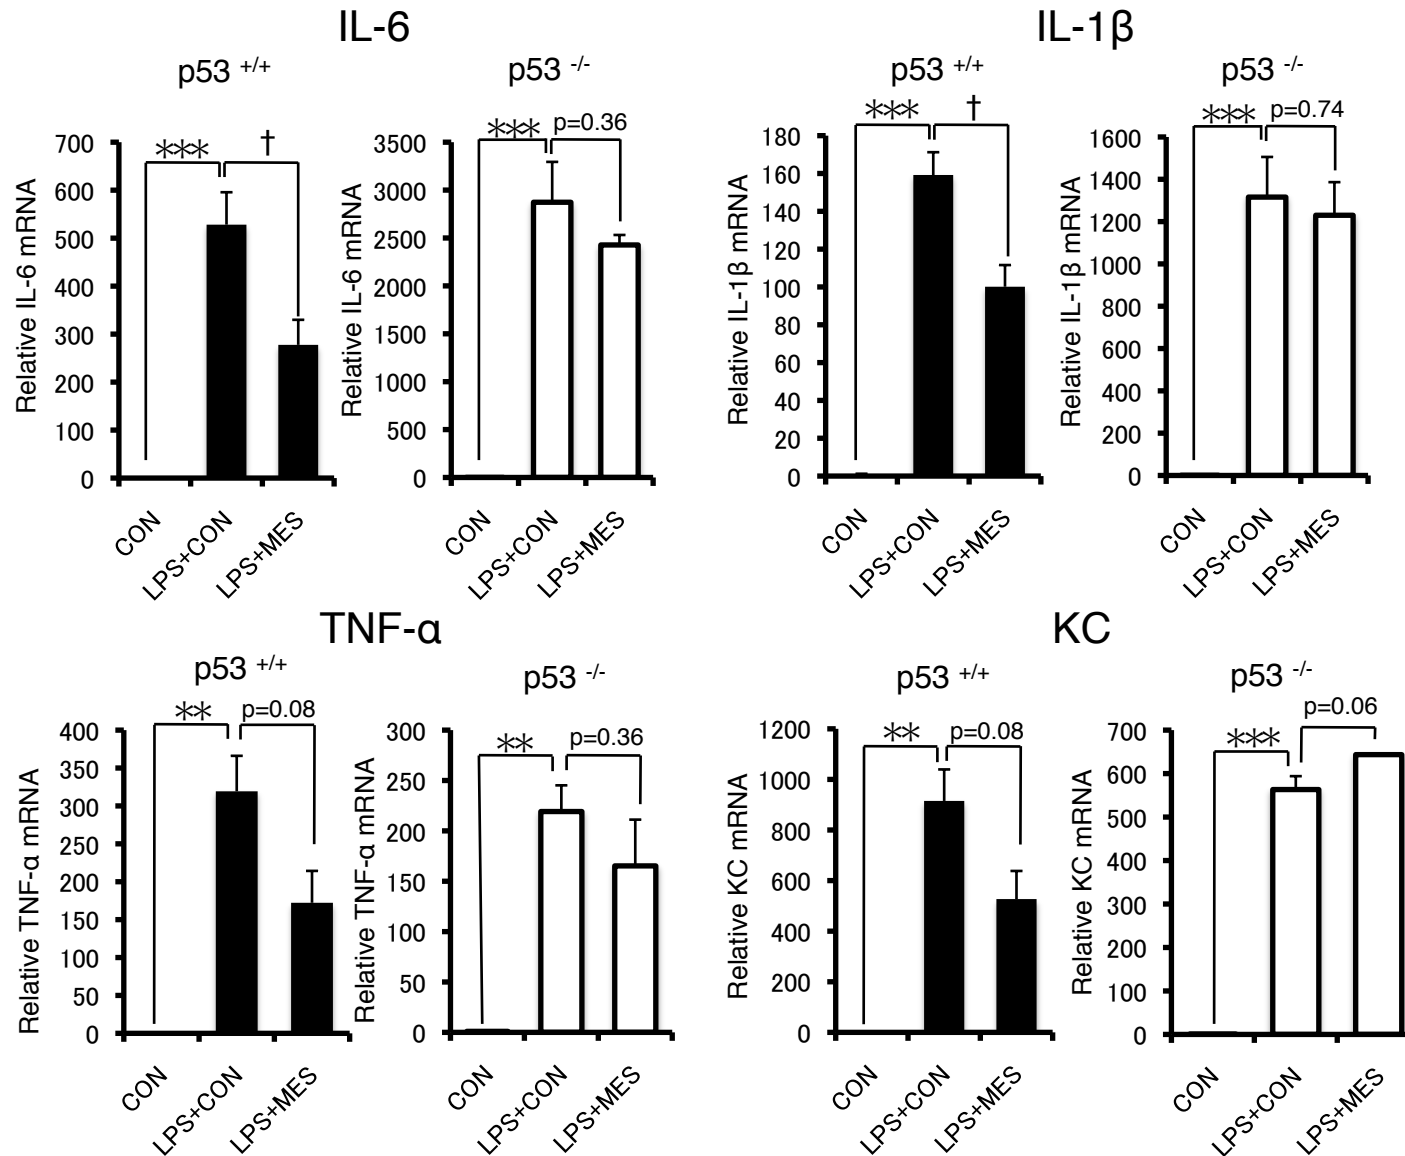

### MES attenuates LPS-induced inflammatory cytokine response dependently on p53 in peritoneal macrophages.

p53<sup>+/+</sup> or p53<sup>-/-</sup> mouse-derived peritoneal macrophages were pre-treated with MES (1 V/cm, 0.1 ms, 55 pps) for 30min and stimulated with 0.01μg/ml of lipopolysaccharide (LPS) for 4hr. Total RNA was extracted after LPS treatment and mRNA expression levels of IL-6, IL-1β, TNF-α and KC (mouse IL-8) were analyzed by quantitative real-time PCR. GAPDH was used as internal control. The experiments were performed in triplicate. Bars indicate the mean ± SE. \*\*P<0.01, \*\*\*P<0.001 vs control, †P<0.05 vs LPS+CON, assessed by Student's t-test.

## Supplemental Table S1

Primers used for quantitative PCR in Supplemental Figure S6.

| <b>Primer name</b>                   | <b>Forward</b>                   | <b>Reverse</b>                  |
|--------------------------------------|----------------------------------|---------------------------------|
| <b>mouse IL-6</b>                    | 5'-GAGGATACCACTCCCAACAGACC -3'   | 5'-AAGTGCATCATCGTTGTTTCATACA-3' |
| <b>mouse IL-1<math>\beta</math></b>  | 5'-GCTGAAAGCTCTCCACCTCAATG -3'   | 5'-TGTCGTTGCTTGGTTCTCCTTG -3'   |
| <b>mouse TNF-<math>\alpha</math></b> | 5'-CATCTTCTCAAAATTCGAGTGACAA -3' | 5'-TGGGAGTAGACAAGGTACAACCC -3'  |
| <b>mouse IL-8 (KC)</b>               | 5'-TGTCAGTGCCTGCAGACCAT -3'      | 5'-GAGCCTTAGTTTGGACAGGATCTG -3' |
| <b>mouse GAPDH</b>                   | 5'-CCTGGAGAAACCTGCCAAGTATG -3'   | 5'-GGTCCTCAGTGTAGCCCAAGATG -3'  |
